# Supplementary material
Source: PubMed Central journal article supplement (PMC2798125)
Supplement: supp_122_24_4516__5.pdf [file supp_122_24_4516__5.pdf]

**Table S1. List of mitochondrial related transcripts identified by GO analysis. Genes are listed in order of fold change following NRG + IGF stimulation of Schwann cells as compared to untreated Schwann cells.**

| NRG.IGF v Control<br>Fold change | P value            | Symbol                 | Description                                                                                 |
|----------------------------------|--------------------|------------------------|---------------------------------------------------------------------------------------------|
| 3.573024018                      | 5.27E-005          | Ldlr                   | low density lipoprotein receptor-related protein 5 (predicted)                              |
| 2.624189988                      | 0.000196           | Brca1                  | breast cancer 1                                                                             |
| 2.356672202                      | 3.60E-007          | Mthfd1                 | methylenetetrahydrofolate dehydrogenase (NADP+ dependent)                                   |
| 2.244335644                      | 0.000359           | RGD:1303041            | NS5A (hepatitis C virus) transactivated protein 9                                           |
| 1.990017823                      | 7.98E-005          | Gatm                   | glycine amidinotransferase (L-arginine:glycine amidinotransferase)                          |
| 1.919951041                      | 6.51E-005          | LOC361546              | similar to RIKEN cDNA 2310005O14                                                            |
| 1.917031658                      | 6.02E-006          | Ak2                    | adenylate kinase 2                                                                          |
| 1.902575622                      | 0.000544           | Ung_predicted          | uracil-DNA glycosylase                                                                      |
| 1.861393098                      | 1.49E-005          | Bdh                    | 3-hydroxybutyrate dehydrogenase, type 1                                                     |
| 1.810721884                      | 4.90E-006          | Mrs2l                  | MRS2-like, magnesium homeostasis factor (S. cerevisiae)                                     |
| 1.777052758                      | 0.000294           | Gls                    | glutaminase                                                                                 |
| 1.768278688                      | 0.00026            | RGD:621430             | solute carrier family 25 (mitochondrial carrier; dicarboxylate transporter), member 10      |
| 1.76202714                       | 0.000282           | RGD:1359658            | BCS1-like (yeast)                                                                           |
| 1.756479177                      | 0.000126           | Gja1                   | gap junction membrane channel protein alpha 1                                               |
| 1.737151238                      | 0.000729           | Sfxn1_predicted        | sideroflexin 1                                                                              |
| 1.698739739                      | 7.61E-005          | Dutp                   | deoxyuridine triphosphatase                                                                 |
| 1.695806319                      | 0.000994           | LOC499335              | frataxin (predicted)                                                                        |
| 1.652825342                      | 0.000398           | Gcsh                   | glycine cleavage system protein H (aminomethyl carrier)                                     |
| <b>1.646341115</b>               | <b>0.000182</b>    | <b>Cycs</b>            | <b>cytochrome c, somatic</b>                                                                |
| 1.635774633                      | 0.000236           | Ckb                    | creatine kinase, brain                                                                      |
| 1.626916572                      | 0.000111           | Shmt1_predicted        | serine hydroxymethyltransferase 1 (soluble)                                                 |
| 1.61255442                       | 0.000198           | Fh1                    | fumarate hydratase 1                                                                        |
| 1.604457078                      | 0.000843           | Timm8a                 | translocase of inner mitochondrial membrane 8 homolog a (yeast)                             |
| 1.592035784                      | 0.001489           | RGD1306651_predicted   | similar to mitochondrial carrier protein MGC4399                                            |
| 1.585443702                      | 0.002074           | Mrpl14_predicted       | mitochondrial ribosomal protein L14 (predicted)                                             |
| 1.579202992                      | 7.06E-006          | Pdp2                   | pyruvate dehydrogenase phosphatase isoenzyme 2                                              |
| 1.57847475                       | 0.000159           | Fabp3                  | fatty acid binding protein 3                                                                |
| 1.577600983                      | 9.63E-005          | Tmpo                   | solute carrier family 25 (mitochondrial carrier; adenine nucleotide translocator), member 3 |
| 1.576759139                      | 3.89E-005          | Slc25a15_predicted     | solute carrier family 25 (mitochondrial carrier; ornithine transporter) member 15           |
| 1.572970185                      | 0.000102           | RGD1305677_predicted   | similar to RIKEN cDNA 1810020E01                                                            |
| 1.570973923                      | 0.000392           | Bckdhh                 | branched chain keto acid dehydrogenase E1, beta polypeptide                                 |
| 1.570229822                      | 0.000158           | Mrpl17                 | mitochondrial ribosomal protein L17                                                         |
| 1.559570939                      | 0.005761           | Ogg1                   | 8-oxoguanine DNA-glycosylase 1                                                              |
| 1.555353687                      | 0.000277           | Dhodh                  | dihydroorotate dehydrogenase                                                                |
| 1.541044079                      | 0.00597            | Hk2                    | hexokinase 2                                                                                |
| 1.533587454                      | 0.00016            | Mtch2_predicted        | mitochondrial carrier homolog 2 (C. elegans) (predicted)                                    |
| 1.503375434                      | 0.00138            | RGD:1303022            | translocase of outer mitochondrial membrane 40 homolog (yeast)                              |
| 1.47171759                       | 0.004375           | Tfb1m                  | transcription factor B1, mitochondrial                                                      |
| 1.470731775                      | 0.001179           | Timm9                  | translocase of inner mitochondrial membrane 9 homolog (yeast)                               |
| 1.468285581                      | 6.91E-005          | Hspd1                  | heat shock protein 1 (chaperonin)                                                           |
| 1.465510646                      | 0.002252           | RGD1304825_predicted   | similar to RIKEN cDNA 2010309E21 (predicted)                                                |
| 1.464126768                      | 0.000822           | Nrbf1                  | mitochondrial trans-2-enoyl-CoA reductase                                                   |
| 1.462819058                      | 0.000756           | Hspe1                  | heat shock 10 kDa protein 1 (chaperonin 10)                                                 |
| 1.437670109                      | 0.00047            | Atp5g1                 | ATP synthase, H+ transporting, mitochondrial F0 complex, subunit c (subunit 9), isoform 1   |
| <b>1.437243933</b>               | <b>0.000210173</b> | <b>Pprc1_predicted</b> | <b>Peroxisome proliferative activated receptor, gamma, coactivator-related 1</b>            |

|                   |                 |                      |                                                                                                       |
|-------------------|-----------------|----------------------|-------------------------------------------------------------------------------------------------------|
| 1.43188639        | 0.000602        | Noc4_predicted       | COX4 neighbor                                                                                         |
| 1.421084307       | 0.001475        | Acat1                | acetyl-coenzyme A acetyltransferase 1                                                                 |
| 1.416512711       | 0.002369        | Timm17a              | translocator of inner mitochondrial membrane 17a                                                      |
| <b>1.41450971</b> | <b>0.005451</b> | <b>Phb</b>           | <b>prohibitin</b>                                                                                     |
| 1.413290603       | 0.00353         | LOC362322            | similar to citrin (predicted)                                                                         |
| 1.405131265       | 0.00294         |                      | hairy/enhancer-of-split related with YRPW motif 2                                                     |
| 1.400641847       | 0.000977        | Mrpl45_predicted     | mitochondrial ribosomal protein L45 (predicted)                                                       |
| 1.396029655       | 0.004937        | Mrpl49_predicted     | mitochondrial ribosomal protein L49                                                                   |
| 1.395301851       | 0.00354         | RGD1309529_predicted | similar to DNA segment, Chr 10, ERATO Doi 214, expressed (predicted)                                  |
| 1.390965364       | 0.000165        | Mor1                 | malate dehydrogenase 2, NAD (mitochondrial)                                                           |
| 1.390657293       | 0.00063         | RGD1311696_predicted | tyrosyl-tRNA synthetase 2 (mitochondrial)                                                             |
| 1.382955594       | 0.000318        | Cyc1_predicted       | cytochrome c-1 (predicted)                                                                            |
| 1.38121754        | 0.001414        | Mrps26_predicted     | mitochondrial ribosomal protein S26 (predicted)                                                       |
| 1.378509205       | 0.004046        | Cyb5m                | cytochrome b5 type B                                                                                  |
| 1.377406499       | 0.005125        | Gosr2                | golgi SNAP receptor complex member 2                                                                  |
| 1.365918229       | 0.001124        | Slc25a5              | solute carrier family 25 (mitochondrial carrier; adenine nucleotide translocator), member 5           |
| 1.360045929       | 0.001909        | Gapd                 | glyceraldehyde-3-phosphate dehydrogenase                                                              |
| 1.359016377       | 0.001257        | RGD:1359688          | nipsnap homolog 3A (C. elegans)                                                                       |
| 1.35236727        | 0.00041         | RGD:1359733          | TNF receptor-associated protein 1                                                                     |
| 1.350929535       | 0.005333        | Slc25a25             | solute carrier family 25 (mitochondrial carrier, phosphate carrier), member 25                        |
| 1.349667007       | 0.004712        | Mrps2_predicted      | mitochondrial ribosomal protein S2 (predicted)                                                        |
| 1.344860767       | 0.000527        | Atad3a_predicted     | ATPase family, AAA domain containing 3A                                                               |
| 1.339208796       | 0.001961        | Aldh7a1_predicted    | aldehyde dehydrogenase family 7, member A1                                                            |
| 1.333965076       | 0.001705        | Bcap37               | prohibitin 2                                                                                          |
| 1.3269251         | 0.001647        | Acs15                | acyl-CoA synthetase long-chain family member 5                                                        |
| 1.322791266       | 0.000382        | Tbfg4_predicted      | transforming growth factor beta regulated gene 4                                                      |
| 1.310095015       | 0.0021          | LOC361596            | similar to NADP+-specific isocitrate dehydrogenase                                                    |
| 1.295618365       | 0.005419        | Ndufb8_predicted     | NADH dehydrogenase (ubiquinone) 1 beta subcomplex 8 (predicted)                                       |
| 1.294485835       | 0.003069        | RGD1311696_predicted | dynamin 1-like                                                                                        |
| 1.29341834        | 0.003037        | RGD1311462_predicted | NADH dehydrogenase (ubiquinone) 1 alpha subcomplex, 12 (predicted)                                    |
| 1.270623334       | 0.00185         | Dbi                  | diazepam binding inhibitor                                                                            |
| 1.265237133       | 0.002281        | Nme2                 | expressed in non-metastatic cells 2                                                                   |
| 1.261804167       | 0.004679        |                      | solute carrier family 25 (mitochondrial oxodicarboxylate carrier), member 21                          |
| 1.252537292       | 0.005302        | Prss15               | protease, serine, 15                                                                                  |
| 1.251565413       | 0.003469        | Smfn_predicted       | REX2, RNA exonuclease 2 homolog (S. cerevisiae)                                                       |
| 1.24095222        | 0.002123        | Afg311_predicted     | AFG3(ATPase family gene 3)-like 1 (yeast) (predicted)                                                 |
| 1.237459986       | 0.002789        | RGD1308697_predicted | similar to hypothetical protein FLJ10579                                                              |
| -1.234634239      | 0.004196        | Ttc11_predicted      | fission 1 (mitochondrial outer membrane) homolog (yeast)                                              |
| -1.236030438      | 0.004188        | RGD:1303003          | homolog of zebrafish ES1                                                                              |
| -1.247581063      | 0.003685        | Itm2b                | integral membrane protein 2B                                                                          |
| -1.250190352      | 0.003671        | Mlycd                | malonyl-CoA decarboxylase                                                                             |
| -1.269202814      | 0.00442         | Slc25a12_predicted   | solute carrier family 25 (mitochondrial carrier, Aralar), member 12 (predicted)                       |
| -1.272272995      | 0.005896        |                      | PET112-like (yeast) (predicted)                                                                       |
| -1.288210514      | 0.002582        | Slc25a17_predicted   | solute carrier family 25 (mitochondrial carrier, peroxisomal membrane protein), member 17 (predicted) |
| -1.289285904      | 0.002192        | Sod1                 | superoxide dismutase 1                                                                                |
| -1.300554592      | 0.002813        | Acadv1               | acyl-Coenzyme A dehydrogenase, very long chain                                                        |
| -1.316009636      | 0.000633        | Cat                  | catalase                                                                                              |
| -1.334617178      | 0.00236         | RGD:1359171          | mitochondrial ribosomal protein L9                                                                    |
| -1.35421263       | 0.00182         | Psap                 | prosaposin                                                                                            |

|              |           |                 |                                                               |
|--------------|-----------|-----------------|---------------------------------------------------------------|
| -1.365581295 | 0.000338  | Amacr           | alpha-methylacyl-CoA racemase                                 |
| -1.40232708  | 5.40E-005 | Hsd17b4         | hydroxysteroid (17-beta) dehydrogenase 4                      |
| -1.416084706 | 0.000126  | Ech1            | enoyl coenzyme A hydratase 1, peroxisomal                     |
| -1.418760691 | 0.00152   | Dguok_predicted | deoxyguanosine kinase (predicted)                             |
| -1.450501516 | 0.001332  | Cpt1a           | carnitine palmitoyltransferase 1a, liver                      |
| -1.474072678 | 0.000694  | Otc             | ornithine transcarbamylase                                    |
| -1.489190604 | 0.001014  | Ppqb_predicted  | protective protein for beta-galactosidase                     |
| -1.505932636 | 0.001121  | Aldoc           | aldolase C                                                    |
| -1.545669774 | 0.000113  | Sfxn3           | sideroflexin 3                                                |
| -1.566623979 | 0.001428  | Pts             | 6-pyruvoyl-tetrahydropterin synthase                          |
| -1.573789732 | 0.000364  | Auh_predicted   | AU RNA binding protein/enoyl-coenzyme A hydratase (predicted) |
| -1.588417844 | 0.000288  | Bnip3l          | BCL2/adenovirus E1B 19 kDa-interacting protein 3-like         |
| -1.595884312 | 6.18E-005 | Hspa1a          | heat shock 70kD protein 1A                                    |
| -1.59638791  | 0.000459  | Cdc42bpa        | chaperone, ABC1 activity of bc1 complex like (S. pombe)       |
| -1.64897021  | 0.000181  | Glul            | glutamate-ammonia ligase (glutamine synthase)                 |
| -1.670068879 | 0.000694  | Pdk2            | pyruvate dehydrogenase kinase, isoenzyme 2                    |
| -1.814866991 | 5.16E-005 | Pdk4            | pyruvate dehydrogenase kinase, isoenzyme 4                    |
| -2.069340949 | 3.71E-006 | Ghr             | growth hormone receptor                                       |
