# Supplementary material
Source: PubMed Central journal article supplement (PMC2798125)

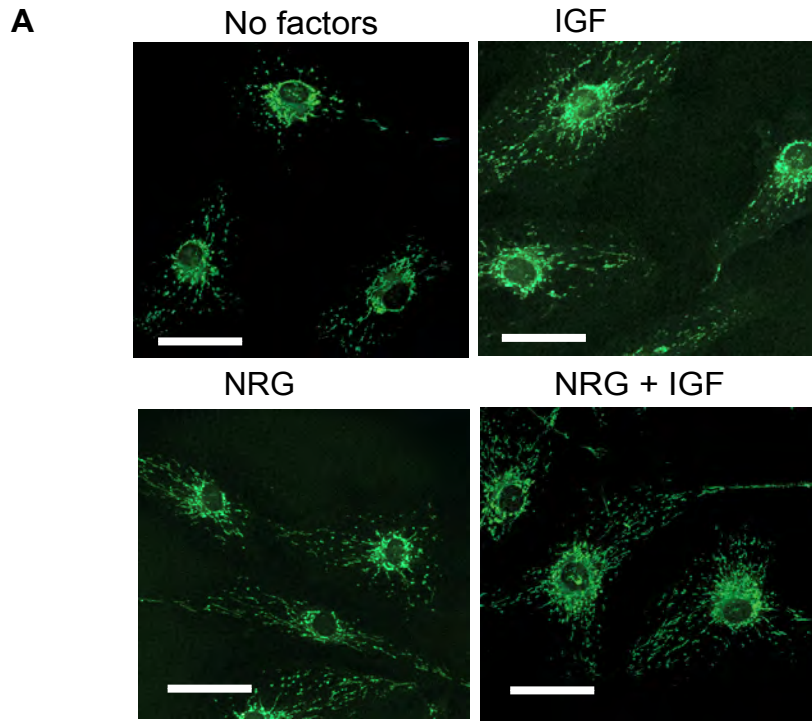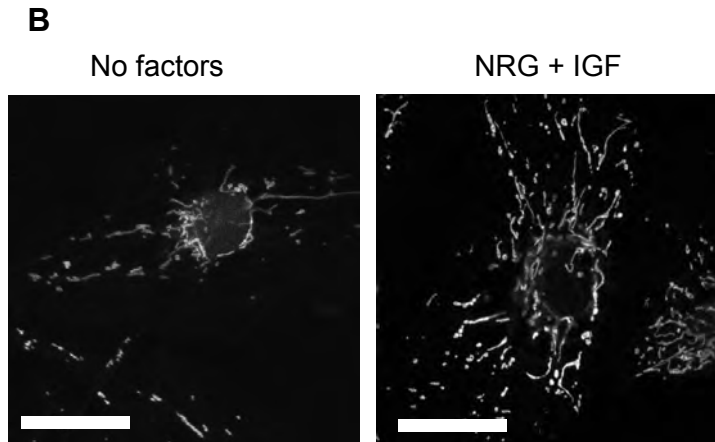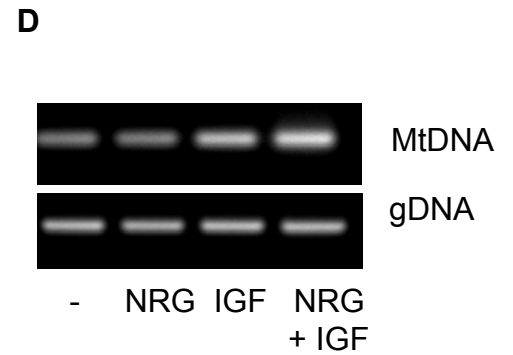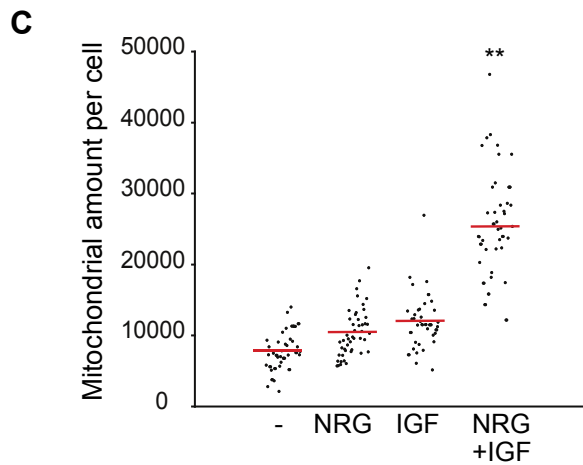

Supplement: supp_122_24_4516__1.pdf [file supp_122_24_4516__1.pdf]

**A**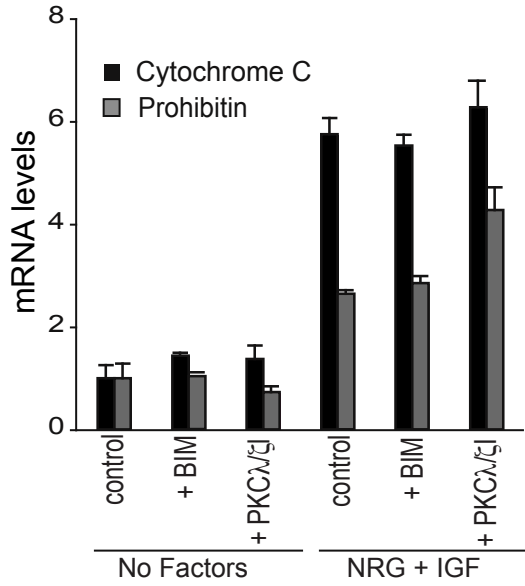**B**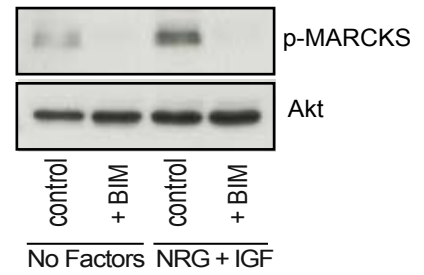**C**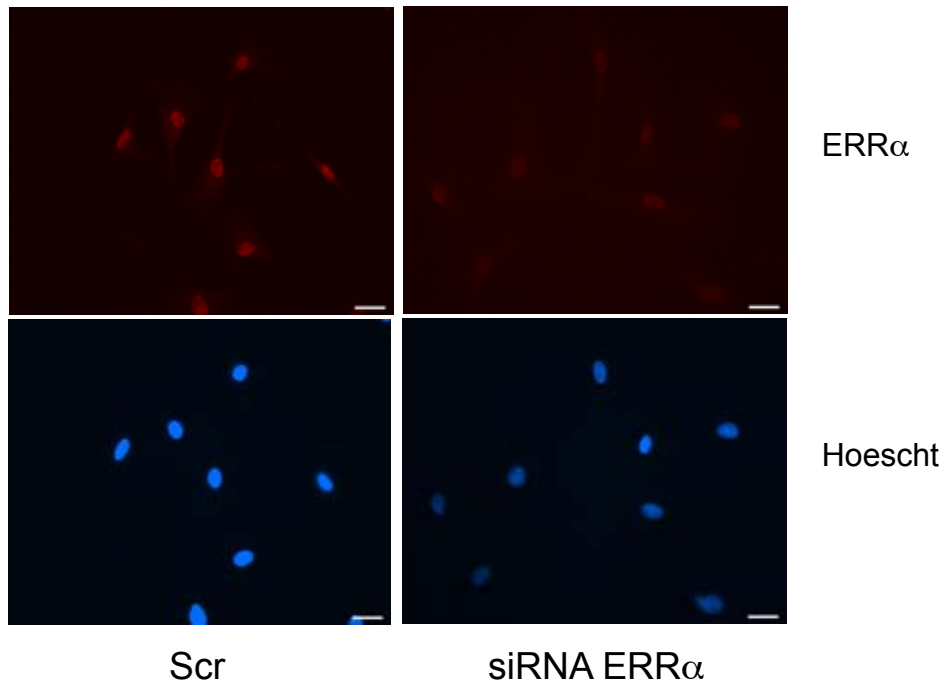

Supplement: supp_122_24_4516__2.pdf [file supp_122_24_4516__2.pdf]

**A**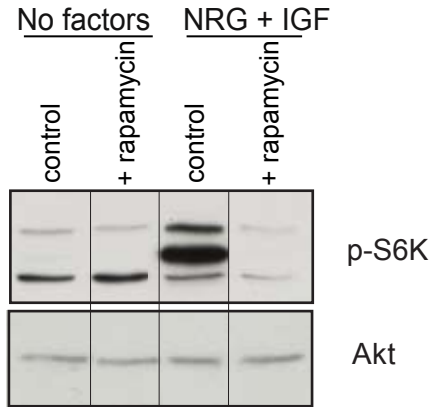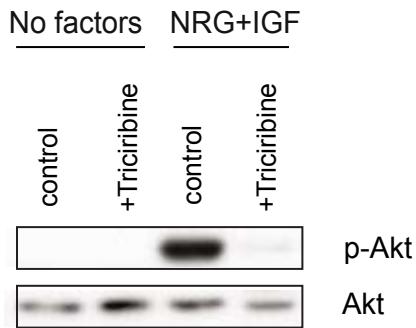**B**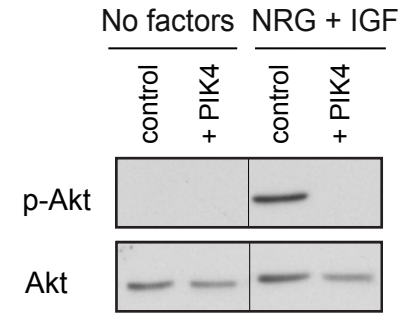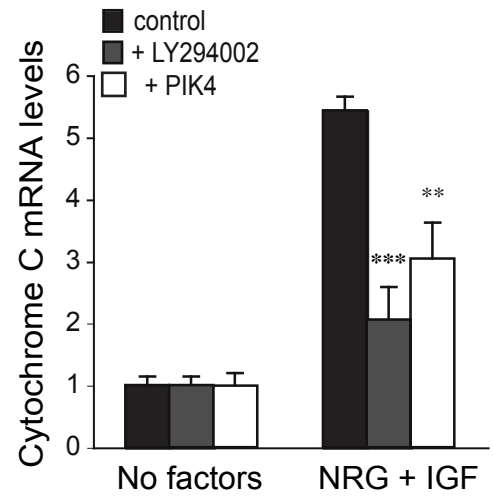**C**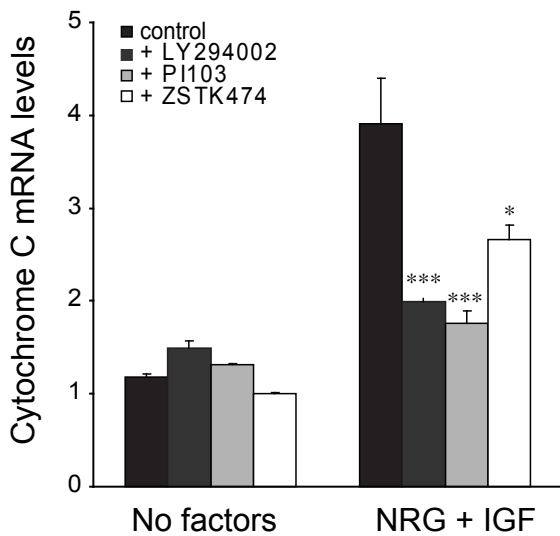**D**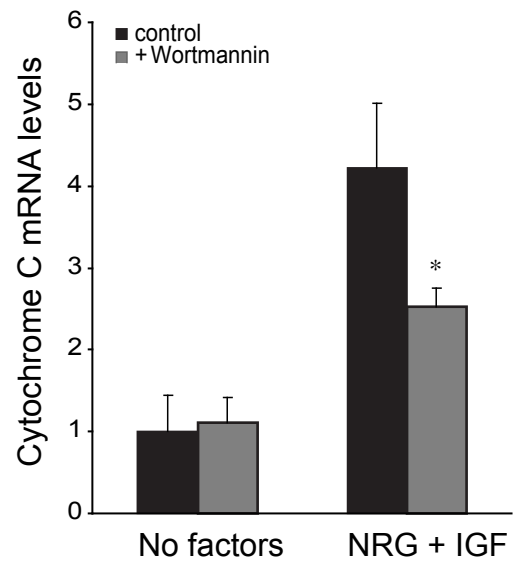

Supplement: supp_122_24_4516__3.pdf [file supp_122_24_4516__3.pdf]

**A**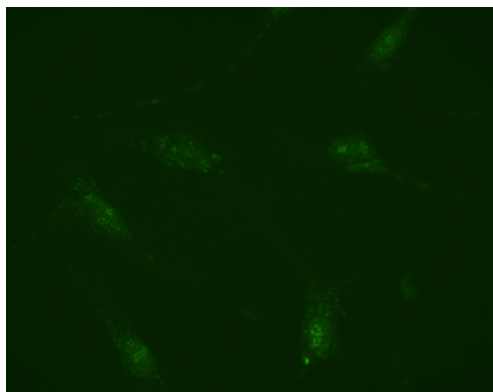**B**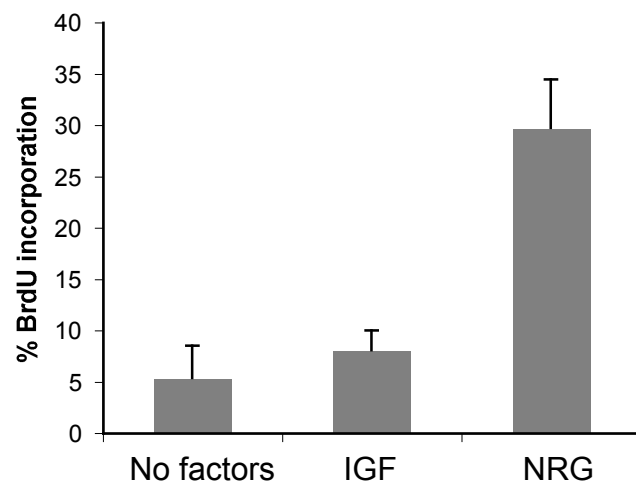**C**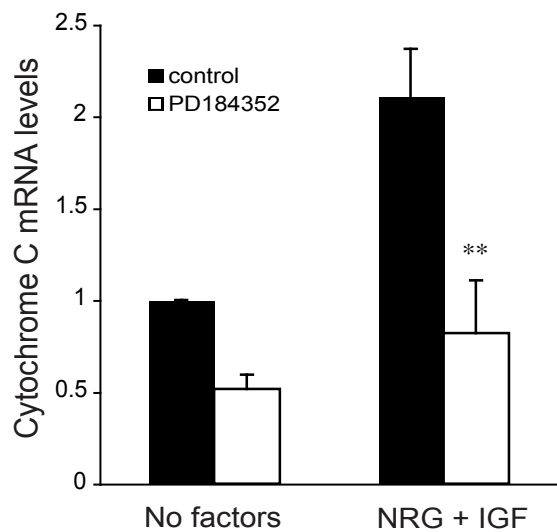**D**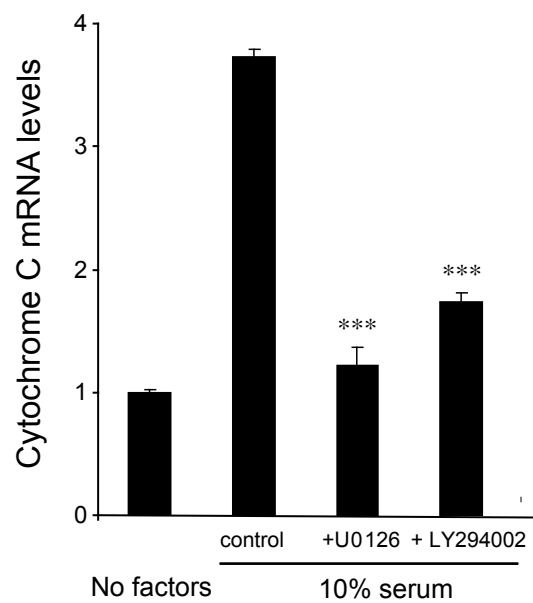

Supplement: supp_122_24_4516__4.pdf [file supp_122_24_4516__4.pdf]
